# Supplementary material for: The Polarizing Trend of Regional CO2 Emissions in China and Its Implications
Source: PubMed Central journal article supplement (PMC10035028; doi:10.1021/acs.est.2c08052), 2023-02-28
Supplement: es2c08052_si_001.pdf [file es2c08052_si_001.pdf]

Supplementary Information for:

# The Polarising Trend of Regional CO<sub>2</sub> Emissions in China and Its Implications

Authors: Kehan He<sup>1</sup>, Zhifu Mi<sup>1\*</sup>, Jin Zhang<sup>2,3</sup>, Jinkai Li<sup>2,4\*</sup>, D'Maris Coffman<sup>1</sup>

<sup>1</sup> The Bartlett School of Sustainable Construction, University College London, London, WC1E 7HB, UK

<sup>2</sup> Center for Energy, Environment & Economy Research, Zhengzhou University, Zhengzhou 450001, China

<sup>3</sup> School of Public Policy and Management, Tsinghua University, Beijing 100084, China

<sup>4</sup> Center for Energy Economics and Sustainability, Peking University, Beijing 100871, China

\* Corresponding Authors:

Zhifu Mi: [z.mi@ucl.ac.uk](mailto:z.mi@ucl.ac.uk)

Jinkai Li: [lijinkai@sina.com](mailto:lijinkai@sina.com)

Number of pages (Including this cover page): 8

Number of figures: 0

Number of tables: 5

**This file includes:**

Table S1. Province to Region Concordance.

Table S2. The Net Export of CO<sub>2</sub> Emissions Among the Eight Regions of China in 2007, 2012, and 2017.

Table S3. Consumption-Based CO<sub>2</sub> vs Final Consumption.

Table S4. Percentage of Consumption-Based CO<sub>2</sub> vs Percentage of Final Consumption.

Table S5. The Net Export of CO<sub>2</sub> Emissions Between China and Rest of the World (RoW) Regions in 2007, 2012, and 2017.

Table S1. Province to Region Concordance. It shows the specification of provinces assignment to regions

| <b>Province</b> | <b>Region</b>   | <b>Province</b> | <b>Region</b> |
|-----------------|-----------------|-----------------|---------------|
| Beijing         | Beijing–Tianjin | Hunan           | Central       |
| Tianjin         | Beijing–Tianjin | Guangdong       | South Coast   |
| Hebei           | North           | Guangxi         | Southwest     |
| Shanxi          | Central         | Hainan          | South Coast   |
| Inner Mongolia  | Northwest       | Chongqing       | Southwest     |
| Liaoning        | Northeast       | Sichuan         | Southwest     |
| Jilin           | Northeast       | Guizhou         | Southwest     |
| Heilongjiang    | Northeast       | Yunnan          | Southwest     |
| Shanghai        | Central Coast   | Tibet           | Southwest     |
| Jiangsu         | Central Coast   | Shaanxi         | Northwest     |
| Zhejiang        | Central Coast   | Gansu           | Northwest     |
| Anhui           | Central         | Qinghai         | Northwest     |
| Fujian          | South Coast     | Ningxia         | Northwest     |
| Jiangxi         | Central         | Xinjiang        | Northwest     |
| Shandong        | North           | Taiwan          | No data       |
| Henan           | Central         | Hong Kong       | No data       |
| Hubei           | Central         | Macao           | No data       |

Table S2. The Net Export of CO<sub>2</sub> Emissions Among the Eight Regions of China in 2007, 2012, and 2017.

| Mt CO <sub>2</sub> | 2007 | CNE   | CBT  | CNO   | CCE   | CCC   | CSC  | CNW   | CSW   | Total Domestic Export |
|--------------------|------|-------|------|-------|-------|-------|------|-------|-------|-----------------------|
| Northeast          | CNE  | 0.0   | 16.4 | -5.1  | 5.8   | 19.1  | 8.1  | -48.9 | 8.0   | 3.3                   |
| Beijing–Tianjin    | CBT  | -16.4 | 0.0  | -40.3 | -24.2 | -1.0  | 0.3  | -33.3 | -2.8  | -117.7                |
| North              | CNO  | 5.1   | 40.3 | 0.0   | -19.3 | 77.1  | 21.2 | -16.1 | 15.6  | 123.9                 |
| Central            | CCE  | -5.8  | 24.2 | 19.3  | 0.0   | 86.4  | 19.3 | 1.4   | -8.1  | 136.8                 |
| Central Coast      | CCC  | -19.1 | 1.0  | -77.1 | -86.4 | 0.0   | 0.9  | -40.9 | -13.5 | -235.0                |
| South Coast        | CSC  | -8.1  | -0.3 | -21.2 | -19.3 | -0.9  | 0.0  | -14.1 | -35.0 | -98.9                 |
| Northwest          | CNW  | 48.9  | 33.3 | 16.1  | -1.4  | 40.9  | 14.1 | 0.0   | 13.0  | 165.0                 |
| Southwest          | CSW  | -8.0  | 2.8  | -15.6 | 8.1   | 13.5  | 35.0 | -13.0 | 0.0   | 22.7                  |
| Mt CO <sub>2</sub> | 2012 | CNE   | CBT  | CNO   | CCE   | CCC   | CSC  | CNW   | CSW   | Total Domestic Export |
| Northeast          | CNE  | 0.0   | 13.9 | -13.8 | -4.5  | 0.3   | 7.0  | -20.0 | 11.4  | -5.7                  |
| Beijing–Tianjin    | CBT  | -13.9 | 0.0  | -21.9 | -27.0 | -10.0 | -0.6 | -39.2 | -4.5  | -117.1                |
| North              | CNO  | 13.8  | 21.9 | 0.0   | 3.2   | 30.3  | 15.9 | -38.1 | 13.0  | 59.9                  |
| Central            | CCE  | 4.5   | 27.0 | -3.2  | 0.0   | 38.6  | 26.6 | -38.5 | 15.6  | 70.6                  |
| Central Coast      | CCC  | -0.3  | 10.0 | -30.3 | -38.6 | 0.0   | 14.5 | -40.4 | 4.1   | -81.1                 |
| South Coast        | CSC  | -7.0  | 0.6  | -15.9 | -26.6 | -14.5 | 0.0  | -25.6 | -18.0 | -107.1                |
| Northwest          | CNW  | 20.0  | 39.2 | 38.1  | 38.5  | 40.4  | 25.6 | 0.0   | 32.1  | 234.1                 |
| Southwest          | CSW  | -11.4 | 4.5  | -13.0 | -15.6 | -4.1  | 18.0 | -32.1 | 0.0   | -53.7                 |
| Mt CO <sub>2</sub> | 2017 | CNE   | CBT  | CNO   | CCE   | CCC   | CSC  | CNW   | CSW   | Total Domestic Export |
| Northeast          | CNE  | 0.0   | 7.0  | 3.9   | 1.5   | 13.9  | 11.6 | -24.6 | 4.7   | 18.0                  |
| Beijing–Tianjin    | CBT  | -7.0  | 0.0  | -1.6  | -6.8  | -2.3  | -0.1 | -18.9 | -2.9  | -39.7                 |
| North              | CNO  | -3.9  | 1.6  | 0.0   | -4.4  | 1.9   | 1.8  | -22.6 | -0.8  | -26.4                 |
| Central            | CCE  | -1.5  | 6.8  | 4.4   | 0.0   | 15.0  | 15.8 | -36.0 | 5.3   | 9.8                   |
| Central Coast      | CCC  | -13.9 | 2.3  | -1.9  | -15.0 | 0.0   | 3.2  | -49.5 | -6.3  | -81.1                 |
| South Coast        | CSC  | -11.6 | 0.1  | -1.8  | -15.8 | -3.2  | 0.0  | -48.3 | -8.0  | -88.5                 |
| Northwest          | CNW  | 24.6  | 18.9 | 22.6  | 36.0  | 49.5  | 48.3 | 0.0   | 30.3  | 230.2                 |
| Southwest          | CSW  | -4.7  | 2.9  | 0.8   | -5.3  | 6.3   | 8.0  | -30.3 | 0.0   | -22.2                 |

Table S3. Consumption-Based CO<sub>2</sub> vs Final Consumption. The consumption-based CO<sub>2</sub> emissions, final consumptions, CO<sub>2</sub> emission intensities, and CO<sub>2</sub> net export of 31 provinces in 2007, 2012, and 2017. The deeper red in CO<sub>2</sub> net export means the larger negative net export, while the deeper blue in CO<sub>2</sub> net export means the larger positive net export.

|                | 2007                                             |                                   |                          |                                 | 2012                                             |                                   |                          |                                 | 2017                                             |                                   |                          |                                 |
|----------------|--------------------------------------------------|-----------------------------------|--------------------------|---------------------------------|--------------------------------------------------|-----------------------------------|--------------------------|---------------------------------|--------------------------------------------------|-----------------------------------|--------------------------|---------------------------------|
|                | CBA CO <sub>2</sub> emission intensity (kg/yuan) | Final Consumption (trillion Yuan) | CBA CO <sub>2</sub> (Mt) | CO <sub>2</sub> net export (Mt) | CBA CO <sub>2</sub> emission intensity (kg/yuan) | Final Consumption (trillion Yuan) | CBA CO <sub>2</sub> (Mt) | CO <sub>2</sub> net export (Mt) | CBA CO <sub>2</sub> emission intensity (kg/yuan) | Final Consumption (trillion Yuan) | CBA CO <sub>2</sub> (Mt) | CO <sub>2</sub> net export (Mt) |
| Beijing        | 0.14                                             | 1011.1                            | 140.7                    | -75.5                           | 0.08                                             | 1684.5                            | 134.3                    | -69.0                           | 0.04                                             | 2468.5                            | 95.4                     | -27.0                           |
| Tianjin        | 0.23                                             | 443.5                             | 102.7                    | -42.2                           | 0.12                                             | 1424.0                            | 167.4                    | -48.1                           | 0.09                                             | 1626.1                            | 142.5                    | -12.7                           |
| Hebei          | 0.24                                             | 991.4                             | 236.2                    | 128.2                           | 0.17                                             | 2612.9                            | 436.1                    | 119.5                           | 0.22                                             | 3068.9                            | 681.1                    | 4.9                             |
| Shanxi         | 0.31                                             | 514.3                             | 161.5                    | 92.1                            | 0.21                                             | 1357.8                            | 279.1                    | 101.8                           | 0.31                                             | 1388.7                            | 426.8                    | 44.3                            |
| Inner Mongolia | 0.24                                             | 448.7                             | 108.0                    | 159.2                           | 0.16                                             | 1713.5                            | 280.6                    | 191.1                           | 0.33                                             | 1462.9                            | 481.5                    | 145.6                           |
| Liaoning       | 0.24                                             | 866.6                             | 205.0                    | 55.0                            | 0.13                                             | 2509.4                            | 330.7                    | 37.9                            | 0.22                                             | 2110.6                            | 458.6                    | 2.9                             |
| Jilin          | 0.30                                             | 596.3                             | 179.3                    | -45.7                           | 0.16                                             | 1397.2                            | 221.1                    | -17.7                           | 0.14                                             | 1499.2                            | 211.5                    | -13.6                           |
| Heilongjiang   | 0.26                                             | 597.0                             | 153.5                    | -6.0                            | 0.16                                             | 1527.0                            | 248.1                    | -25.9                           | 0.13                                             | 1749.9                            | 230.5                    | 28.6                            |
| Shanghai       | 0.18                                             | 1090.1                            | 192.8                    | -105.7                          | 0.08                                             | 1721.4                            | 140.9                    | -9.4                            | 0.07                                             | 2628.6                            | 182.7                    | -5.3                            |
| Jiangsu        | 0.16                                             | 1885.7                            | 294.8                    | -11.5                           | 0.10                                             | 4383.6                            | 443.1                    | -6.7                            | 0.10                                             | 7199.6                            | 754.1                    | -36.7                           |
| Zhejiang       | 0.19                                             | 1629.0                            | 305.6                    | -117.9                          | 0.10                                             | 2989.2                            | 296.0                    | -65.0                           | 0.10                                             | 4133.3                            | 403.6                    | -39.2                           |
| Anhui          | 0.20                                             | 717.1                             | 143.6                    | 1.1                             | 0.11                                             | 1740.7                            | 194.5                    | 47.5                            | 0.15                                             | 2389.4                            | 364.9                    | -9.3                            |
| Fujian         | 0.15                                             | 758.4                             | 113.5                    | -20.0                           | 0.10                                             | 1570.3                            | 151.0                    | 1.0                             | 0.08                                             | 2687.6                            | 225.4                    | -0.9                            |
| Jiangxi        | 0.26                                             | 578.6                             | 148.8                    | -55.4                           | 0.11                                             | 1276.8                            | 139.0                    | -19.5                           | 0.12                                             | 1769.3                            | 218.4                    | -2.8                            |
| Shandong       | 0.22                                             | 2079.4                            | 449.3                    | -4.3                            | 0.15                                             | 4506.0                            | 662.8                    | -59.6                           | 0.13                                             | 6405.2                            | 805.6                    | -31.3                           |

|           |      |        |       |       |      |        |       |       |      |        |       |       |
|-----------|------|--------|-------|-------|------|--------|-------|-------|------|--------|-------|-------|
| Henan     | 0.18 | 1303.7 | 229.9 | 79.7  | 0.12 | 3491.4 | 416.4 | -4.4  | 0.11 | 4664.9 | 496.4 | -23.1 |
| Hubei     | 0.20 | 882.6  | 172.2 | 14.7  | 0.14 | 2223.2 | 313.4 | -24.4 | 0.09 | 3303.1 | 298.9 | 6.5   |
| Hunan     | 0.19 | 843.4  | 159.7 | 4.6   | 0.11 | 2256.9 | 250.5 | -30.3 | 0.10 | 3122.7 | 296.8 | -5.8  |
| Guangdong | 0.13 | 2306.4 | 297.2 | -78.5 | 0.08 | 4934.6 | 381.5 | -99.8 | 0.08 | 7447.3 | 596.8 | -95.6 |
| Guangxi   | 0.16 | 565.6  | 90.4  | -3.6  | 0.11 | 1579.4 | 176.0 | -22.5 | 0.12 | 1741.9 | 211.9 | 2.9   |
| Hainan    | 0.13 | 124.9  | 16.2  | -0.4  | 0.11 | 334.9  | 36.7  | -8.3  | 0.07 | 493.0  | 32.8  | 7.9   |
| Chongqing | 0.21 | 437.6  | 92.4  | -16.2 | 0.14 | 1172.5 | 168.2 | -36.6 | 0.10 | 1718.5 | 171.6 | -23.2 |
| Sichuan   | 0.16 | 1019.5 | 167.7 | -12.6 | 0.11 | 2412.5 | 264.2 | -24.2 | 0.08 | 3289.0 | 275.7 | 10.3  |
| Guizhou   | 0.26 | 308.0  | 79.4  | 42.6  | 0.17 | 810.0  | 135.9 | 42.7  | 0.17 | 1452.8 | 241.6 | -3.5  |
| Yunan     | 0.18 | 483.5  | 88.1  | 12.5  | 0.12 | 1477.1 | 178.8 | -13.2 | 0.09 | 2203.7 | 191.5 | -7.5  |
| Tibet     | -    | -      | -     |       | -    | -      | -     |       | 0.03 | 194.4  | 6.1   | -1.3  |
| Shaanxi   | 0.23 | 476.4  | 107.6 | -1.9  | 0.14 | 1602.9 | 220.5 | -30.1 | 0.12 | 2079.6 | 244.1 | 6.3   |
| Gansu     | 0.22 | 279.9  | 61.4  | 7.9   | 0.15 | 684.1  | 102.7 | 20.1  | 0.18 | 752.0  | 133.9 | 7.5   |
| Qinghai   | 0.28 | 90.7   | 25.2  | -6.7  | 0.15 | 263.0  | 39.3  | -4.4  | 0.15 | 342.9  | 51.4  | -1.7  |
| Ningxia   | 0.35 | 118.9  | 41.6  | 10.0  | 0.27 | 261.4  | 71.0  | 44.4  | 0.28 | 569.5  | 162.2 | 11.0  |
| Xinjiang  | 0.27 | 347.3  | 94.3  | -3.4  | 0.19 | 1001.1 | 190.2 | 13.0  | 0.21 | 1559.7 | 328.0 | 61.4  |

Table S4. Percentage of Consumption-Based CO<sub>2</sub> vs Percentage of Final Consumption. The percentage share of consumption-based CO<sub>2</sub> emissions and final consumptions of 31 provinces in 2007, 2012, and 2017. Differences in percentage points between consumption-based CO<sub>2</sub> emissions and final consumptions are also presented. The deeper red in differences in percentage points means the larger share of consumption-based CO<sub>2</sub> emissions than final consumption, while the deeper blue in differences in percentage points means the larger share of final consumption than consumption-based CO<sub>2</sub> emissions.

|                | % of Final Consumption |      |      | % of CBA CO <sub>2</sub> emissions |      |      | Differences in % |       |       | Changes in % |
|----------------|------------------------|------|------|------------------------------------|------|------|------------------|-------|-------|--------------|
|                | 2007                   | 2012 | 2017 | 2007                               | 2012 | 2017 | 2007             | 2012  | 2017  | 2007 - 2017  |
| Beijing        | 4.2%                   | 3.0% | 3.2% | 3.0%                               | 1.9% | 1.0% | 1.2%             | 1.1%  | 2.2%  | 0.9%         |
| Tianjin        | 1.9%                   | 2.5% | 2.1% | 2.2%                               | 2.4% | 1.5% | -0.3%            | 0.1%  | 0.6%  | 0.9%         |
| Hebei          | 4.2%                   | 4.6% | 4.0% | 5.1%                               | 6.2% | 7.2% | -0.9%            | -1.6% | -3.3% | -2.4%        |
| Shanxi         | 2.2%                   | 2.4% | 1.8% | 3.5%                               | 3.9% | 4.5% | -1.3%            | -1.6% | -2.7% | -1.4%        |
| Inner Mongolia | 1.9%                   | 3.0% | 1.9% | 2.3%                               | 4.0% | 5.1% | -0.4%            | -1.0% | -3.2% | -2.8%        |
| Liaoning       | 3.6%                   | 4.4% | 2.7% | 4.4%                               | 4.7% | 4.9% | -0.8%            | -0.3% | -2.1% | -1.4%        |
| Jilin          | 2.5%                   | 2.5% | 1.9% | 3.8%                               | 3.1% | 2.2% | -1.3%            | -0.7% | -0.3% | 1.0%         |
| Heilongjiang   | 2.5%                   | 2.7% | 2.3% | 3.3%                               | 3.5% | 2.4% | -0.8%            | -0.8% | -0.2% | 0.6%         |
| Shanghai       | 4.6%                   | 3.0% | 3.4% | 4.1%                               | 2.0% | 1.9% | 0.4%             | 1.0%  | 1.5%  | 1.0%         |
| Jiangsu        | 7.9%                   | 7.7% | 9.3% | 6.3%                               | 6.3% | 8.0% | 1.6%             | 1.4%  | 1.3%  | -0.3%        |
| Zhejiang       | 6.8%                   | 5.3% | 5.3% | 6.6%                               | 4.2% | 4.3% | 0.3%             | 1.1%  | 1.0%  | 0.8%         |
| Anhui          | 3.0%                   | 3.1% | 3.1% | 3.1%                               | 2.8% | 3.9% | -0.1%            | 0.3%  | -0.8% | -0.7%        |
| Fujian         | 3.2%                   | 2.8% | 3.5% | 2.4%                               | 2.1% | 2.4% | 0.8%             | 0.6%  | 1.1%  | 0.3%         |
| Jiangxi        | 2.4%                   | 2.2% | 2.3% | 3.2%                               | 2.0% | 2.3% | -0.8%            | 0.3%  | 0.0%  | 0.7%         |
| Shandong       | 8.7%                   | 7.9% | 8.3% | 9.6%                               | 9.4% | 8.5% | -0.9%            | -1.5% | -0.3% | 0.6%         |
| Henan          | 5.5%                   | 6.1% | 6.0% | 4.9%                               | 5.9% | 5.3% | 0.5%             | 0.2%  | 0.8%  | 0.2%         |
| Hubei          | 3.7%                   | 3.9% | 4.3% | 3.7%                               | 4.4% | 3.2% | 0.0%             | -0.5% | 1.1%  | 1.1%         |
| Hunan          | 3.5%                   | 4.0% | 4.0% | 3.4%                               | 3.5% | 3.1% | 0.1%             | 0.4%  | 0.9%  | 0.8%         |
| Guangdong      | 9.7%                   | 8.7% | 9.6% | 6.4%                               | 5.4% | 6.3% | 3.3%             | 3.3%  | 3.3%  | 0.0%         |
| Guangxi        | 2.4%                   | 2.8% | 2.2% | 1.9%                               | 2.5% | 2.2% | 0.4%             | 0.3%  | 0.0%  | -0.4%        |
| Hainan         | 0.5%                   | 0.6% | 0.6% | 0.3%                               | 0.5% | 0.3% | 0.2%             | 0.1%  | 0.3%  | 0.1%         |
| Chongqing      | 1.8%                   | 2.1% | 2.2% | 2.0%                               | 2.4% | 1.8% | -0.1%            | -0.3% | 0.4%  | 0.5%         |
| Sichuan        | 4.3%                   | 4.2% | 4.2% | 3.6%                               | 3.7% | 2.9% | 0.7%             | 0.5%  | 1.3%  | 0.6%         |
| Guizhou        | 1.3%                   | 1.4% | 1.9% | 1.7%                               | 1.9% | 2.6% | -0.4%            | -0.5% | -0.7% | -0.3%        |
| Yunan          | 2.0%                   | 2.6% | 2.8% | 1.9%                               | 2.5% | 2.0% | 0.1%             | 0.1%  | 0.8%  | 0.7%         |
| Tibet          |                        |      | 0.3% |                                    |      | 0.1% | 0.0%             | 0.0%  | 0.2%  | 0.2%         |
| Shaanxi        | 2.0%                   | 2.8% | 2.7% | 2.3%                               | 3.1% | 2.6% | -0.3%            | -0.3% | 0.1%  | 0.4%         |
| Gansu          | 1.2%                   | 1.2% | 1.0% | 1.3%                               | 1.5% | 1.4% | -0.1%            | -0.3% | -0.5% | -0.3%        |
| Qinghai        | 0.4%                   | 0.5% | 0.4% | 0.5%                               | 0.6% | 0.5% | -0.2%            | -0.1% | -0.1% | 0.1%         |
| Ningxia        | 0.5%                   | 0.5% | 0.7% | 0.9%                               | 1.0% | 1.7% | -0.4%            | -0.5% | -1.0% | -0.6%        |
| Xinjiang       | 1.5%                   | 1.8% | 2.0% | 2.0%                               | 2.7% | 3.5% | -0.6%            | -0.9% | -1.5% | -0.9%        |

Table S5. The Net Export of CO<sub>2</sub> Emissions Between China and Rest of the World (RoW) Regions in 2007, 2012, and 2017.

|                                 | 2007   |          | 2012   |          | 2017   |          |
|---------------------------------|--------|----------|--------|----------|--------|----------|
| CO <sub>2</sub> Net Export (Mt) | to RoW | to China | to RoW | to China | to RoW | to China |
| Europe                          | -569.2 | -363.6   | -431.0 | -204.8   | -419.3 | -196.6   |
| North America                   | -285.1 | -486.2   | -216.7 | -338.3   | -505.0 | -382.6   |
| East Asia                       | 36.9   | -145.4   | -3.4   | -91.6    | 25.7   | -58.3    |
| China                           | 1615.2 | 0.0      | 1398.1 | 0.0      | 1191.5 | 0.0      |
| BRICS w/o China                 | 566.9  | -75.2    | 448.1  | -77.3    | 603.7  | -30.7    |
| Rest of Asia Pacific            | 158.7  | -310.7   | 100.6  | -417.9   | 127.0  | -287.3   |
| Latin America                   | -0.9   | -76.7    | -26.7  | -104.7   | 3.2    | -106.1   |
| Africa                          | -86.2  | -43.5    | -142.3 | -63.9    | -221.9 | -70.6    |
| Middle East                     | 178.9  | -114.1   | 271.4  | -99.6    | 386.6  | -59.2    |
